# Supplementary material for: Fe/Fe3C encapsulated in nitrogen source-mediated active-N-rich defective carbon nanotubes for bifunctional oxygen catalysis
Source: Royal Society of Chemistry journal article supplement (doi:10.1039/d0nj01164a), 2020-01-01
Supplement: d0nj01164a1.pdf [file d0nj01164a1.pdf]

## Support information

### **Fe/Fe<sub>3</sub>C encapsulated in nitrogen source-mediated active-N-rich defective carbon nanotubes for bifunctional oxygen catalysis**

Fuwen Yang<sup>a,b</sup>, Ying Lei<sup>\*a,b,c</sup>, Huaming Xie<sup>a</sup>, Dandan Zhang<sup>a</sup>, Renxing Huang<sup>a</sup>,  
Xingyong Liu<sup>a,b</sup>, Honghui Wang<sup>a</sup>

<sup>a</sup>College of Chemical Engineering, Sichuan University of Science & Engineering, Zigong 643000, PR China. <sup>b</sup>Collaborative Innovation Center of Industrial Organic Solid Waste Resource Disposal, Sichuan University of Science & Engineering, Zigong 643000, PR China. <sup>c</sup>School of Chemistry and Environmental Engineering, Sichuan University of Science and Engineering, Zigong 64300, Sichuan, PR China.

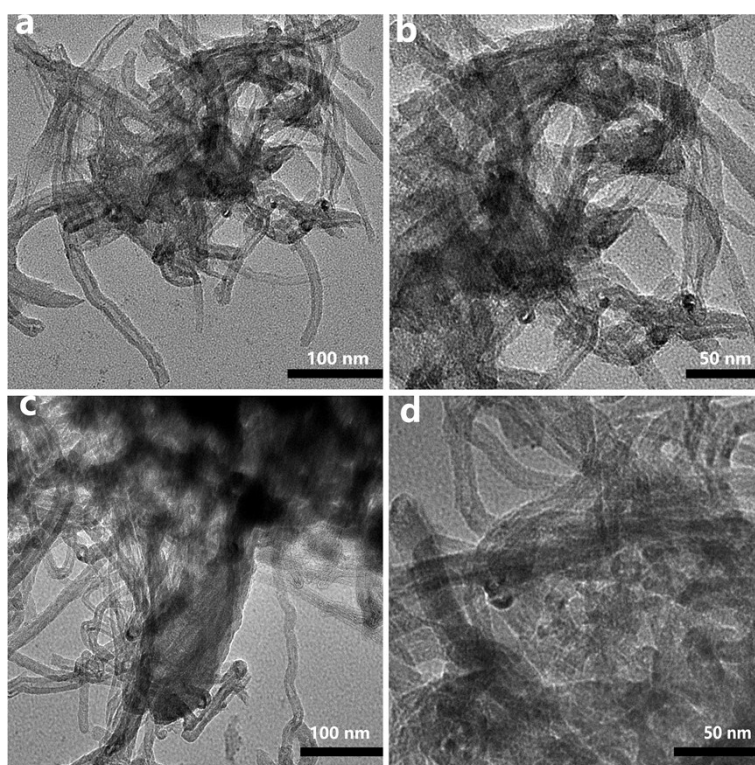

**Fig. S1** (a, b) TEM images of Fe-P-OCNT catalysts, (c, d) TEM images of Fe-U-OCNT catalysts.

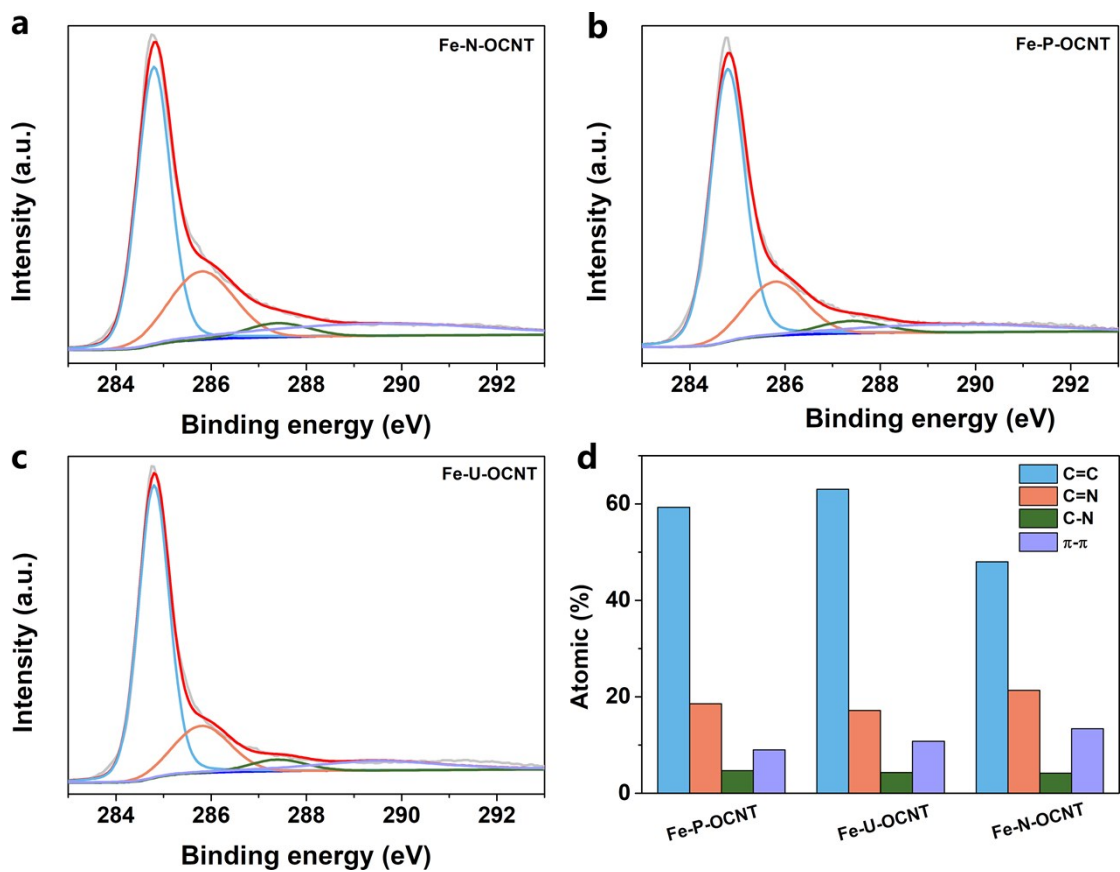

**Fig. S2** (a, b, c) High resolution C 1s spectra, (d) The atomic content of carbon-related functional groups.

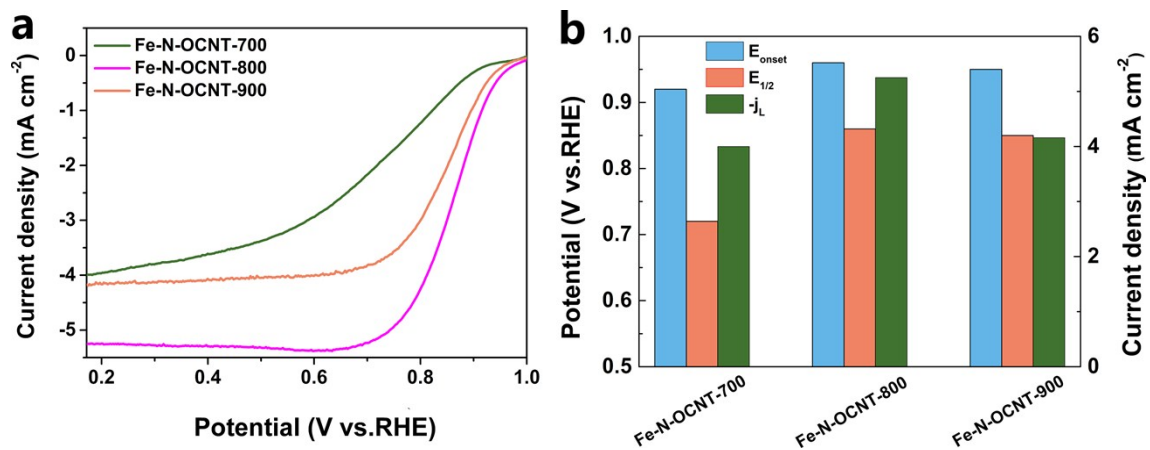

**Fig. S3** (a) Comparison of LSV curves for Fe-N-C-700, Fe-N-C-800, Fe-N-C-900 catalysts, (b) Comparison of electrochemical ORR parameters of samples derived at different temperatures.

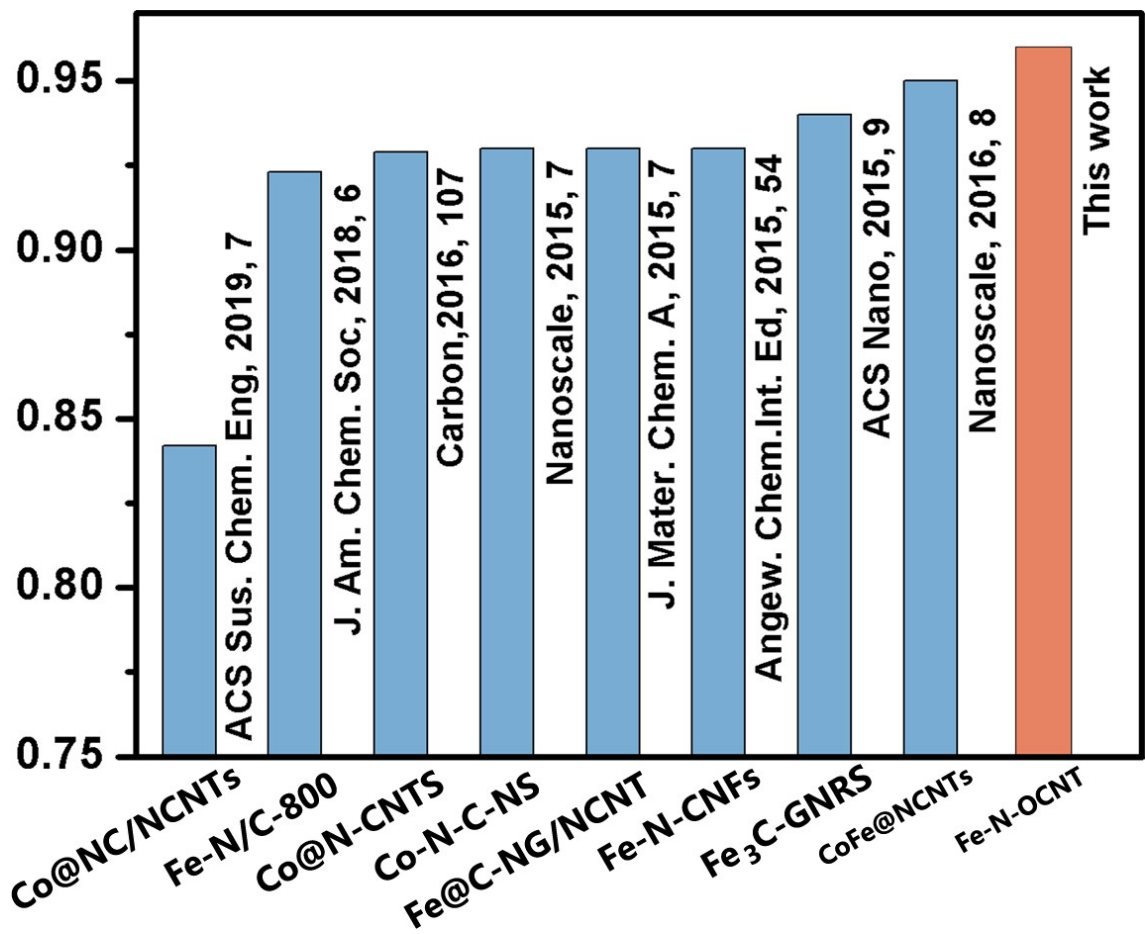

Fig. S4 The comparison of onset potentials with reported works.

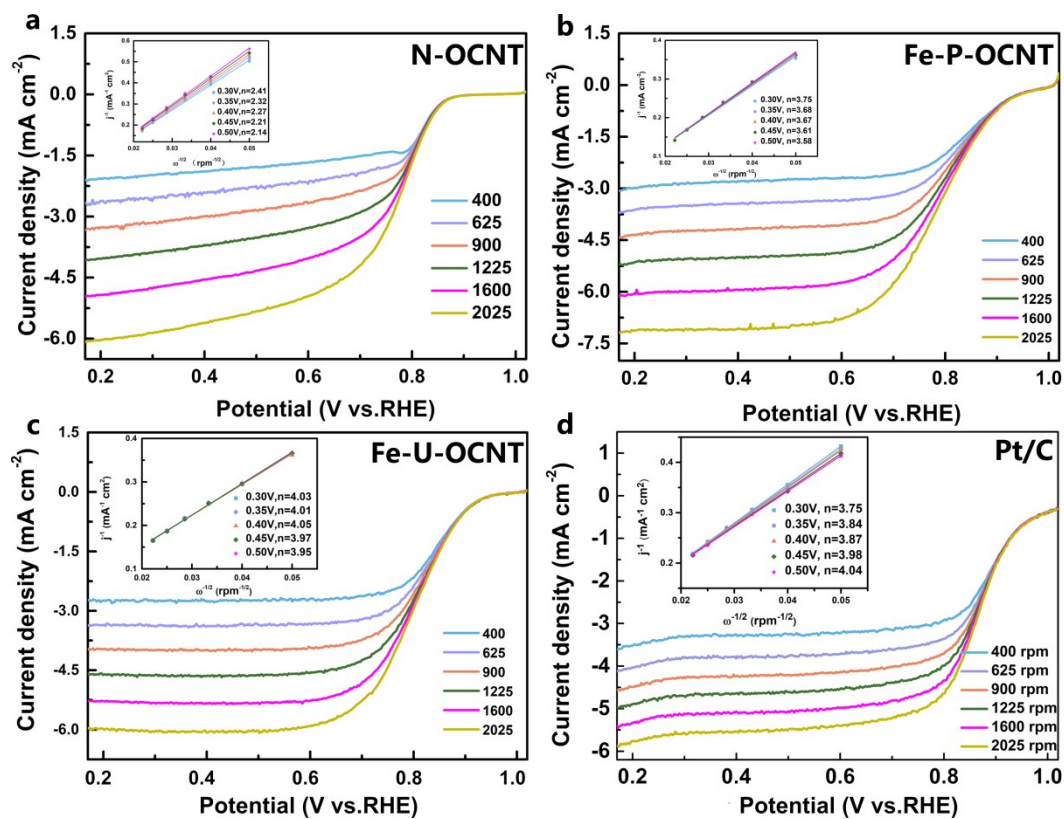

**Fig. S5** (a, b, c, d) LSV curves for N-OCNT, Fe-P-OCNT, Fe-U-OCNT and Pt/C at different rotating rates, the inset is their corresponding K-L plots in the range from 0.30 to 0.50 V, respectively.

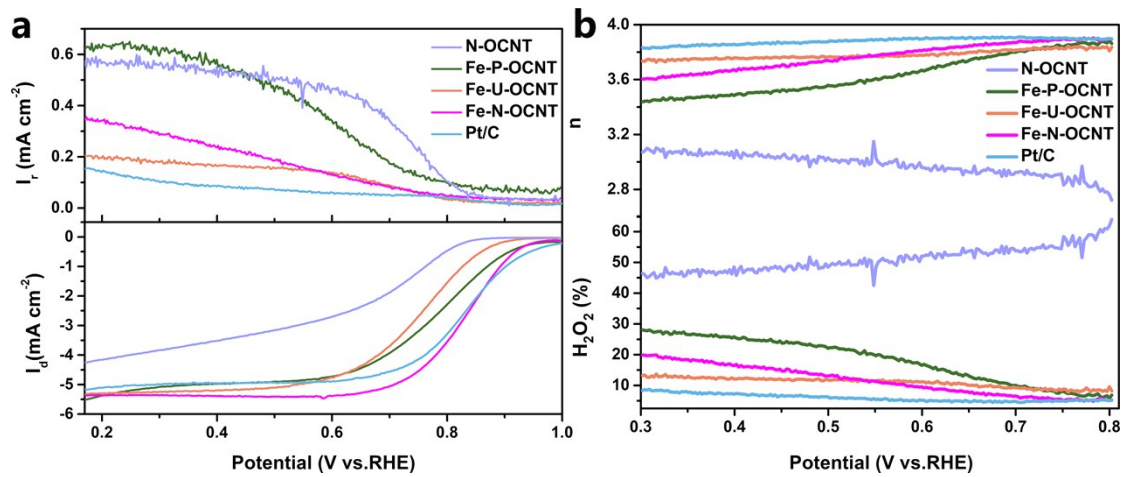

**Fig. S6** (a) RRDE of LSV curves in O<sub>2</sub>-saturated 0.1 M KOH at 1600 rpm with a scanning rate of 10 mV s<sup>-1</sup>; (b) Electron transfer number ( $n$ , top panel) and peroxide yield (bottom panel) obtained based on the corresponding RRDE data.

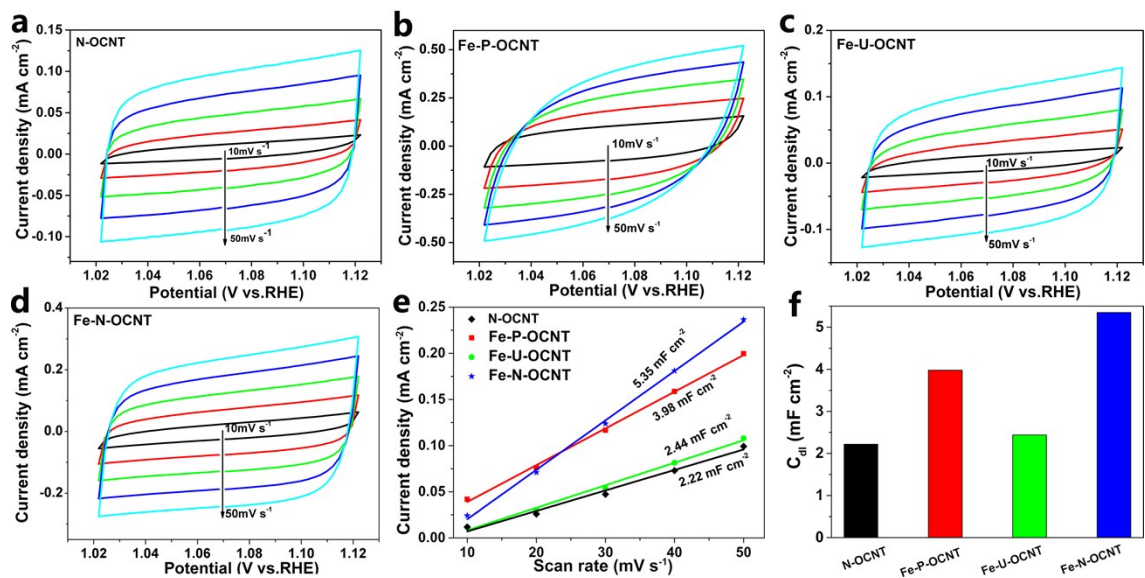

**Fig. S7** (a, b, c, d) CV curves of Fe-P-OCNT, Fe-U-OCNT and Fe-N-OCNT catalysts; (e, f) The capacitive current measured at 1.072 V plotted as a function of scan rate of all catalysts.

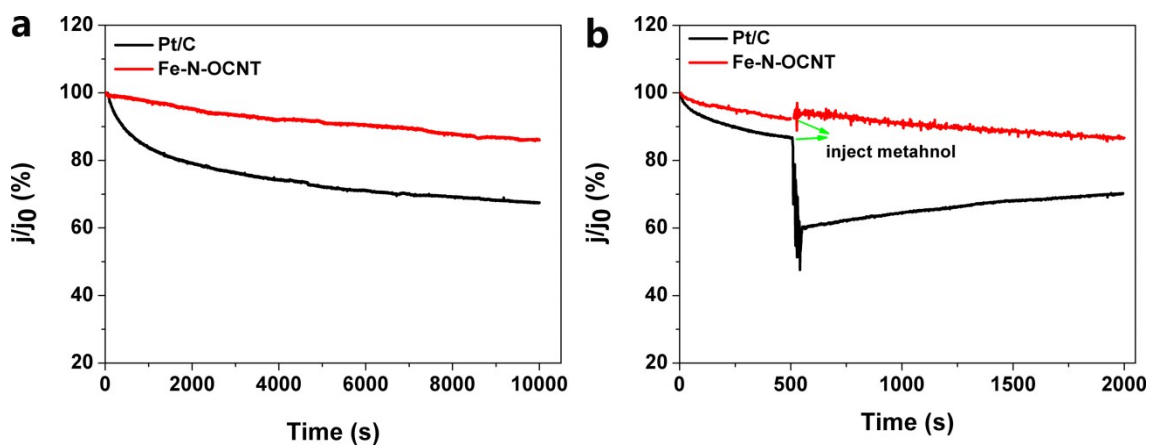

**Fig. S8** (a) The chronoamperometric response curves of Fe-N-OCNT and Pt/C; (b)

The comparison choronamperometric response plots of Fe-N-OCNT and Pt/C with an

additional methanol of 5 mL at 500s.



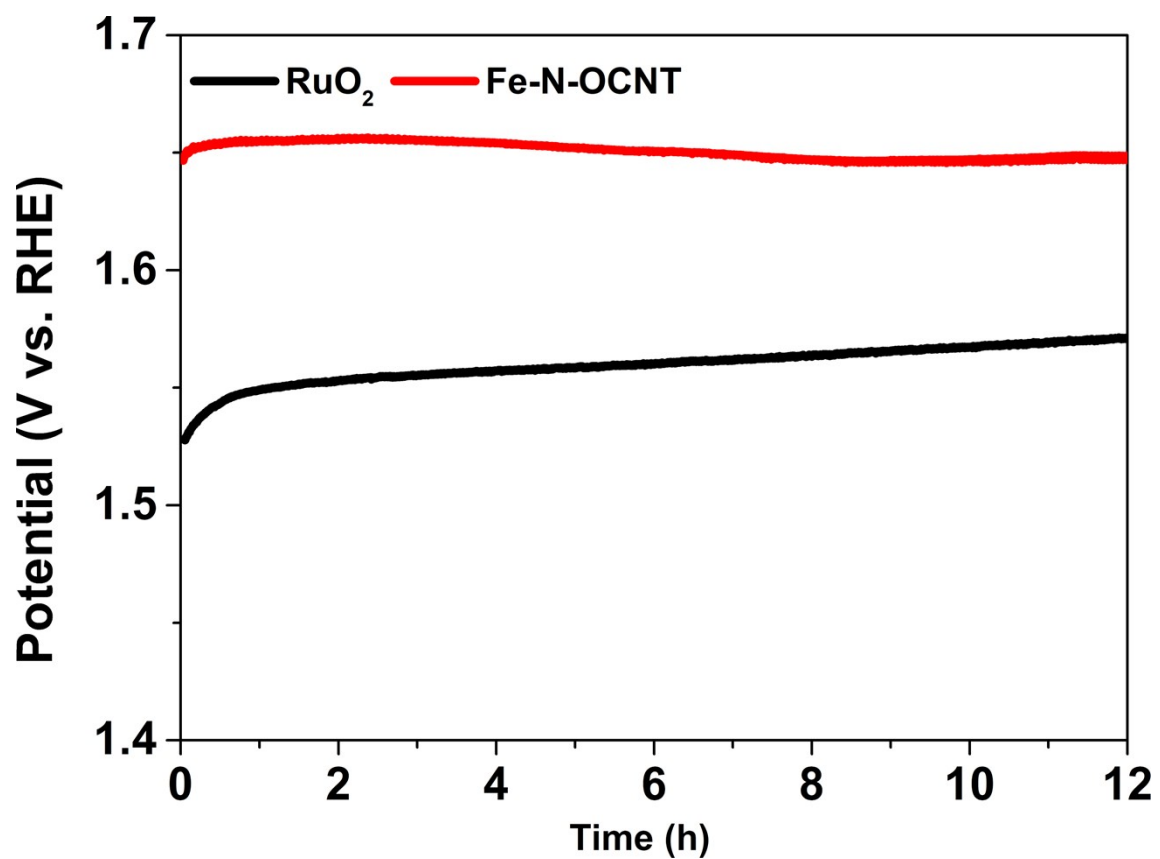

Fig. S9 OER chronopotentiometric response of Fe-N-OCNT and RuO<sub>2</sub> at a constant current of 10 mA cm<sup>-2</sup>.

**Table S1** The comparison of the bifunctional activity of electrocatalysts reported in the previous literature.

| Catalysts                             | ORR<br>$E_{1/2}$ (V) | OER<br>$E_{j=10\text{mA cm}^{-2}}$ (V) | $\Delta E=$<br>$E_{j=10}-E_{1/2}$<br>(V) | References                                               |
|---------------------------------------|----------------------|----------------------------------------|------------------------------------------|----------------------------------------------------------|
| Fe-N-OCNT                             | 0.86                 | 1.583                                  | 0.723                                    | <i>This work</i>                                         |
| Fe@C-NG/NCNTs                         | 0.84                 | 1.68                                   | 0.84                                     | <i>J. Mater. Chem. A</i> , 2018, 6(2): 516-526.          |
| N-NiO                                 | 0.69                 | 1.50                                   | 0.81                                     | <i>ACS Appl. Mater. Int.</i> , 2019, 11(34): 30865-30871 |
| FeCo-N <sub>x</sub> -C                | 0.89                 | 1.67                                   | 0.78                                     | <i>Angew Chem. Int. Ed. Engl.</i> 2018;57:1856-62.       |
| Co <sub>3</sub> O <sub>4</sub> NS/ZTC | 0.70                 | 1.61                                   | 0.91                                     | <i>J. Mater. Chem. A</i> , 2019, 7(16): 9988-9996.       |
| Fe <sub>1.2</sub> Co@NC/NCN Ts        | 0.82                 | 1.58                                   | 0.76                                     | <i>ACS Sus. Chem. Eng.</i> 2019, 7, 9, 8530-8541.        |
| N-GCNT/FeCo-3                         | 0.92                 | 1.73                                   | 0.81                                     | <i>Adv. Energy Mater.</i> 2017, 7, 1602420.              |
| Co-N-CNTs                             | 0.90                 | 1.69                                   | 0.79                                     | <i>Adv. Funct. Mater.</i> 2018, 28, 1705048.             |
| Co-N,B-CSs                            | 0.83                 | 1.66                                   | 0.83                                     | <i>ACS Nano</i> 2018, 12, 1894-1901.                     |
| FeN <sub>x</sub> /PNC                 | 0.86                 | 1.63                                   | 0.77                                     | <i>ACS Nano</i> 2018, 12, 1949                           |
| CoS <sub>x</sub> /NCS                 | 0.79                 | 1.69                                   | 0.90                                     | <i>Mater. Res. Bull.</i> , 2020, 125, 110770.            |
| FeNMC-2                               | 0.885                | Not given                              | Not given                                | <i>Appl. Catal. B: Environ.</i> , 2020, 265, 118593      |
| NPC-1000                              | 0.82                 | Not given                              | Not given                                | <i>Nano-Micro Lett.</i> , 2020, 12, 20                   |

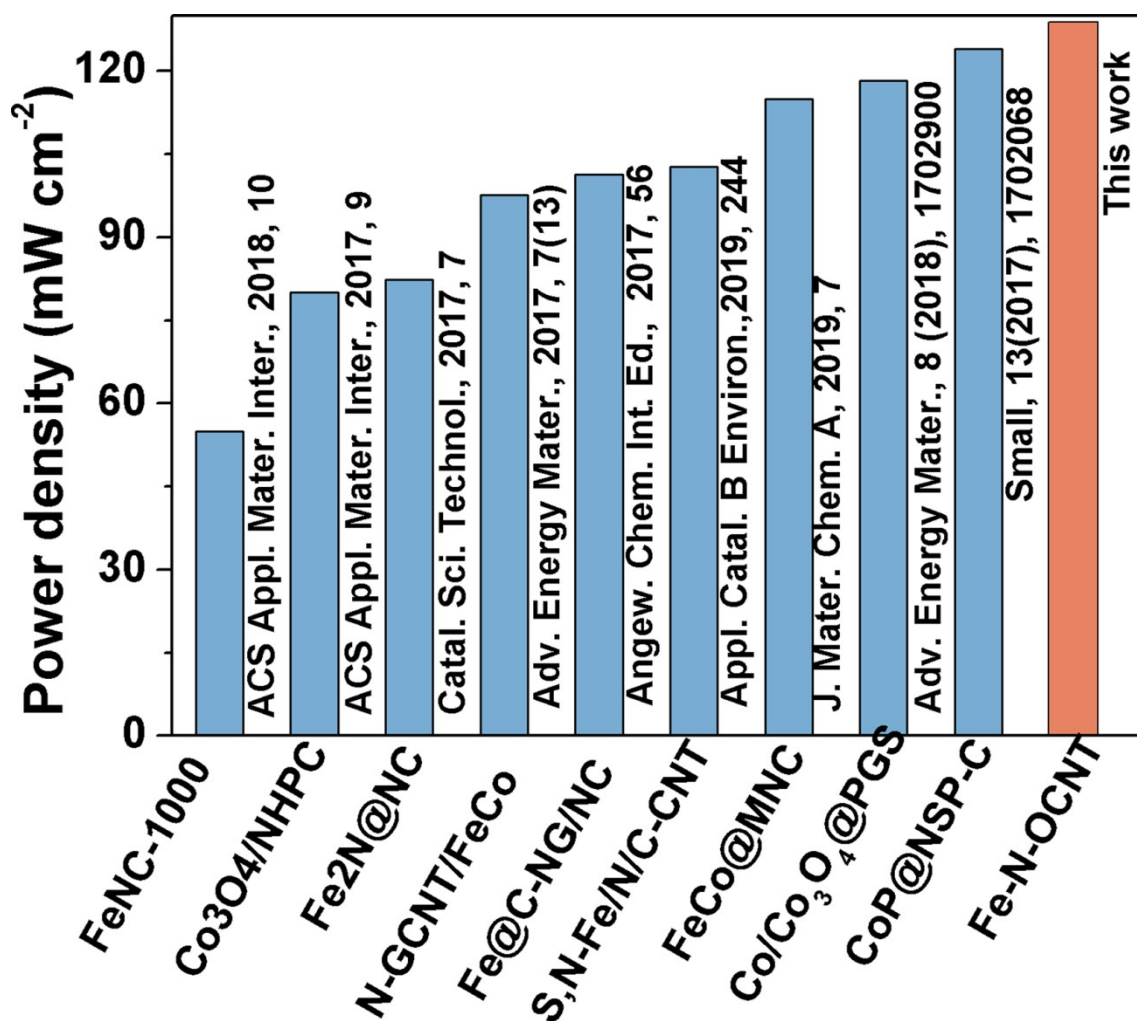

Fig. S10 Power density comparison of pioneer works.
